# Supplementary material
Source: Springer Nature journal article supplement (https://www.springermedizin.de/resource/supplementary/12904_2012_155_MOESM8_ESM.pdf/9517736)

## General public

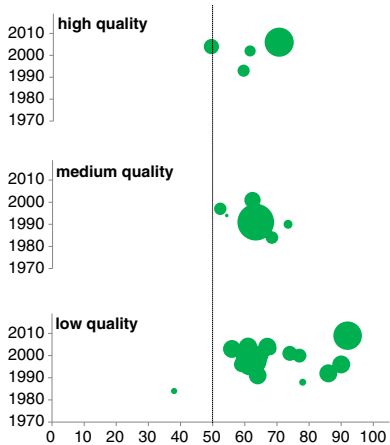

## Patients

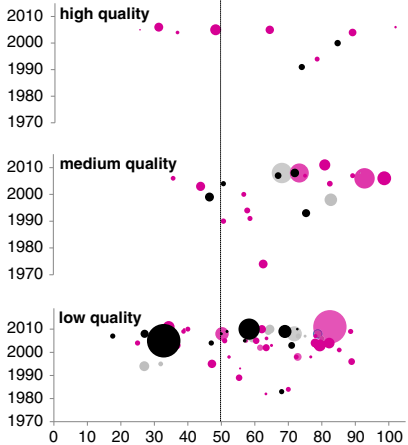

## Caregivers

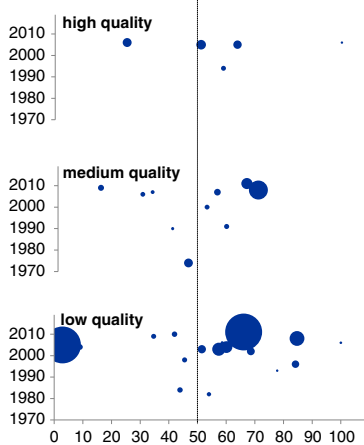

percentage with a preference for dying at home (%)

Supplement: MOESM8 [file 9517736]
